# Supplementary material for: Efficient cascade conversion of starch to gluconic acid by a chemoenzymatic system with co-immobilized Au nanoparticles and enzymes
Source: Royal Society of Chemistry journal article supplement (doi:10.1039/d2cy01641a), 2022-12-21
Supplement: d2cy01641a1.pdf [file d2cy01641a1.pdf]

## Electronic Supplementary Information

# Efficient cascade conversion of starch to gluconic acid by a chemoenzymatic system with co-immobilized Au nanoparticles and enzymes

Jie Gao<sup>a,1</sup>, Zhenfu Wang<sup>a,1</sup>, Ranran Guo<sup>a,1</sup>, Yang Hu<sup>b</sup>, Xiaoyan Dong<sup>a</sup>, Qinghong Shi<sup>a</sup>, Yan Sun<sup>a,\*</sup>

<sup>a</sup> Department of Biochemical Engineering, School of Chemical Engineering and Technology and Key Laboratory of Systems Bioengineering and Frontiers Science Center for Synthetic Biology (Ministry of Education), Tianjin University, Tianjin 300350, China

<sup>b</sup> College of Food Science and Engineering, Ocean University of China, Qingdao, 266003, China

<sup>1</sup> These authors contributed equally to this work.

\* Corresponding author.

E-mail address:

18130282595@163.com (J.Gao)

wangzhf@tju.edu.cn (Z.Wang)

grr@tju.edu.cn (R. Guo)

huyang@ouc.edu.cn (Y.Hu)

d\_xy@tju.edu.cn (X.Dong)

qhshi@tju.edu.cn (Q. Shi)

ysun@tju.edu.cn (Y. Sun)

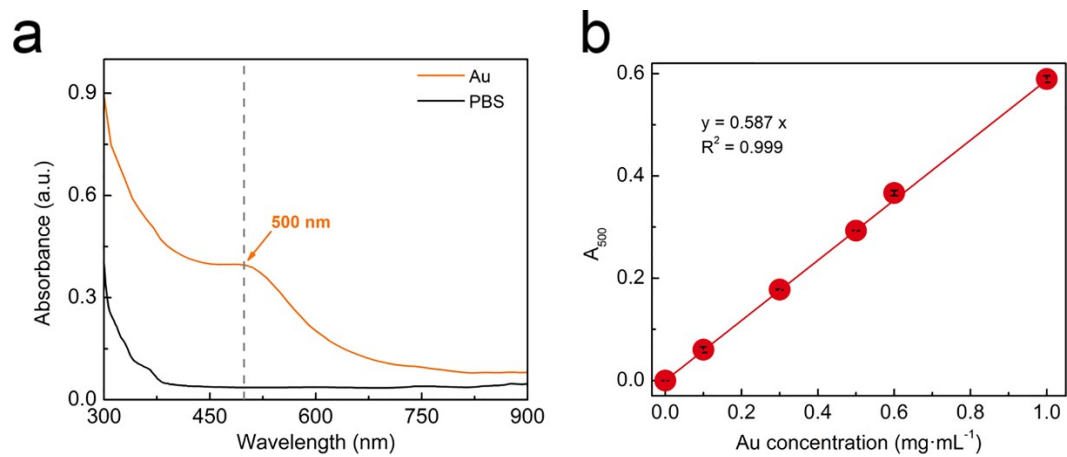

**Fig. S1.** (a) UV-Vis spectrum and (b) calibration curve of Au. Error bars represent standard deviations from triplicate experiments.

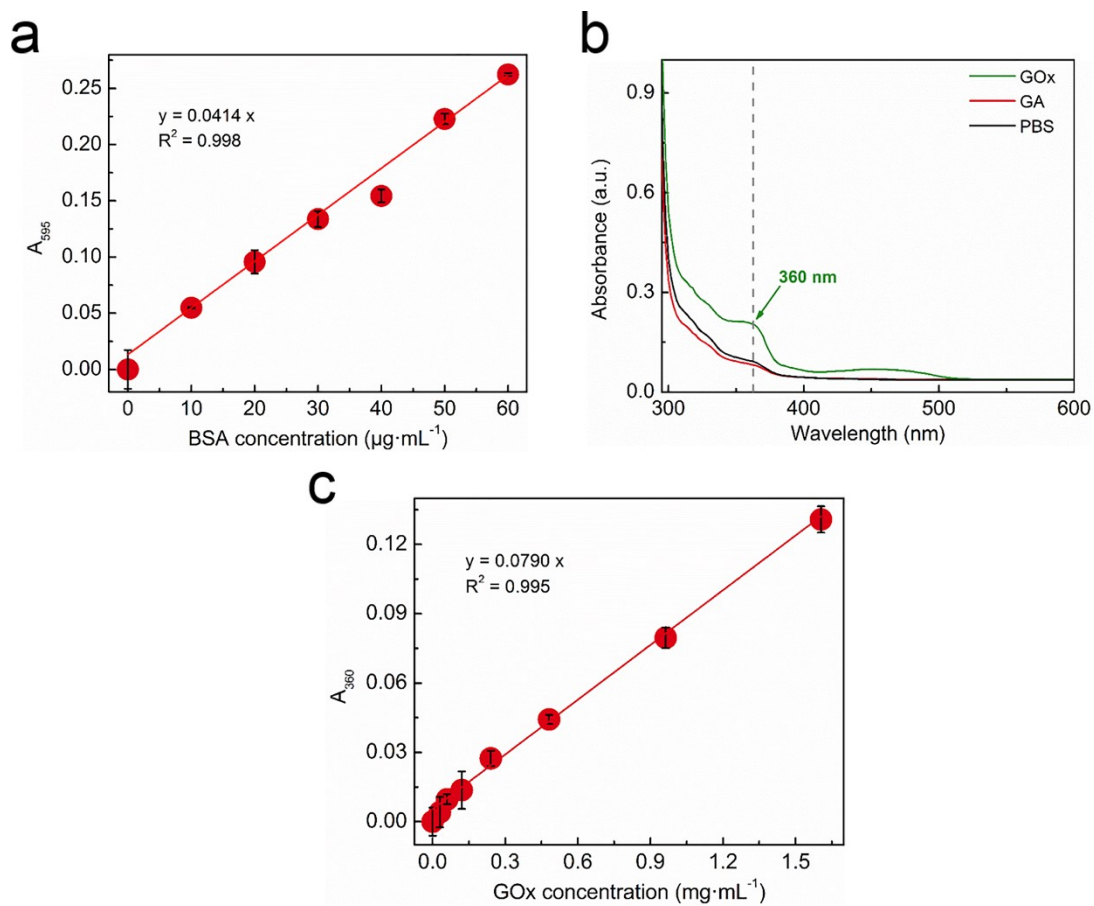

**Fig. S2.** (a) Calibration curve of BSA measured by Bradford method; (b) UV-Vis spectrum and (c) calibration curve of GOx. Error bars represent standard deviations from triplicate experiments.

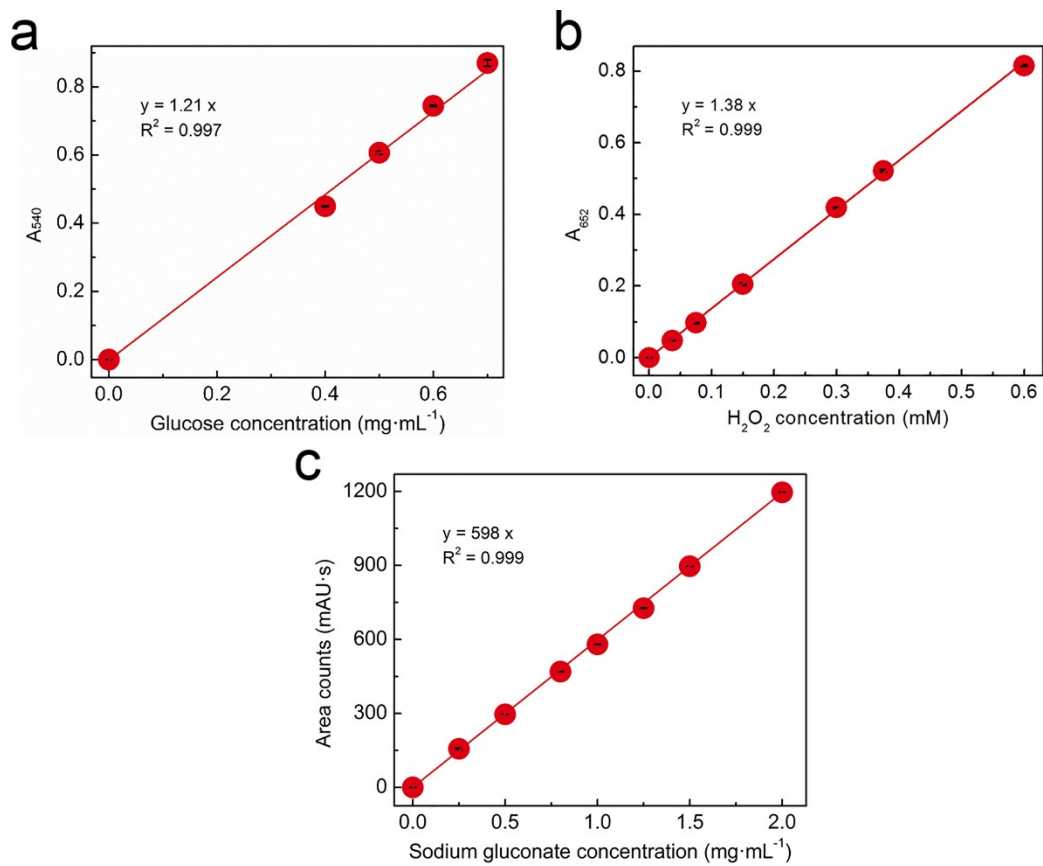

**Fig. S3.** Calibration curves of (a) glucose, (b)  $\text{H}_2\text{O}_2$ , and (c) sodium gluconate. Error bars represent standard deviations from triplicate experiments.

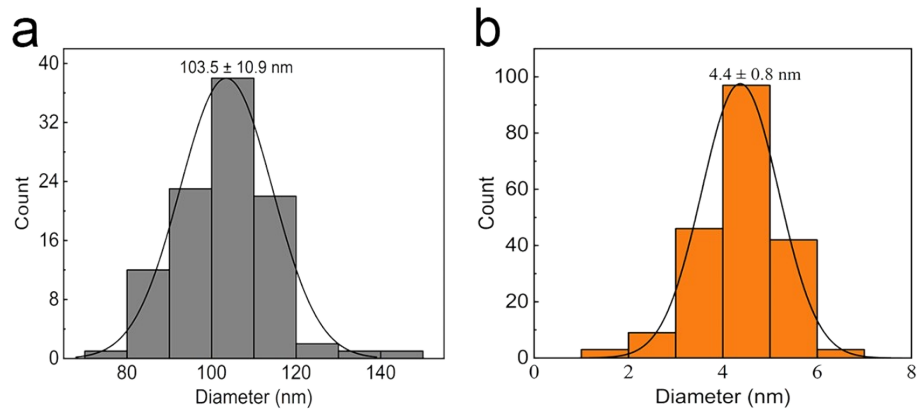

**Fig. S4.** Size distributions of (a) SiO<sub>2</sub> and (b) Au NPs.

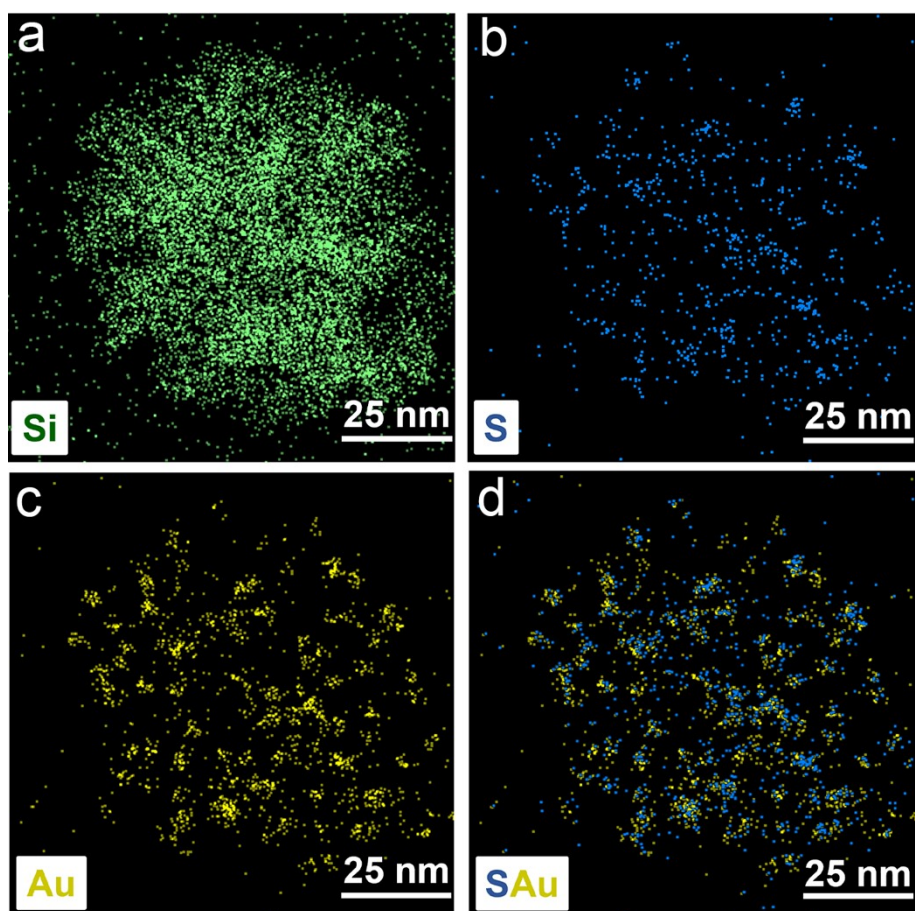

**Fig. S5.** EDX mapping images of Au-SiO<sub>2</sub>, (a) Si, (b) S, (c)Au, and (d) S&Au.

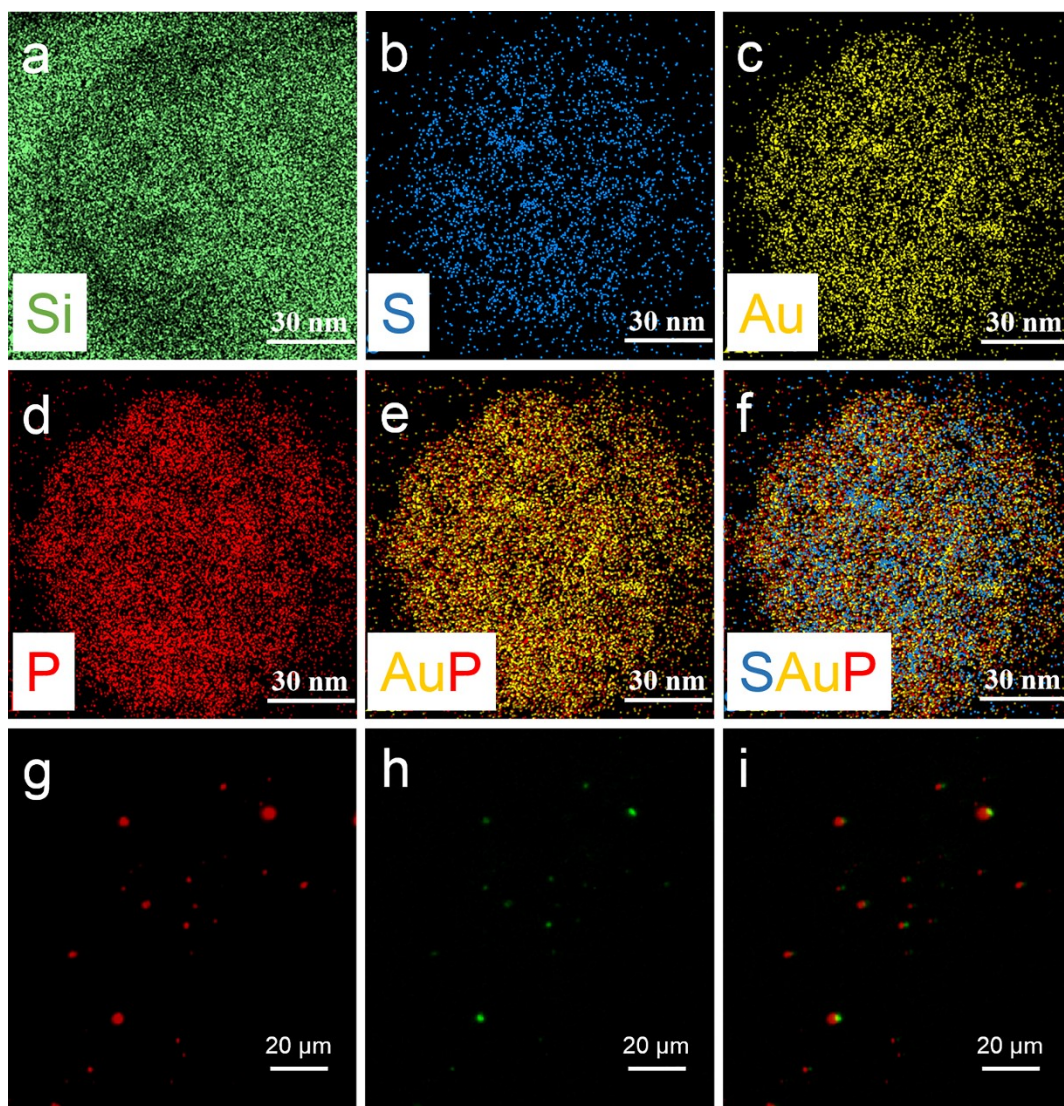

**Fig. S6.** EDX mapping images of GA&GOx@Au-SiO<sub>2</sub>, (a) Si, (b) S, (c) Au, (d) P, (e) Au&P, and (f) S&Au&P. Confocal microscopy images of GA&GOx@Au-SiO<sub>2</sub> (g-i), GA was labeled with RhB (red) (g) and GOx was labeled with FITC (green) (h).



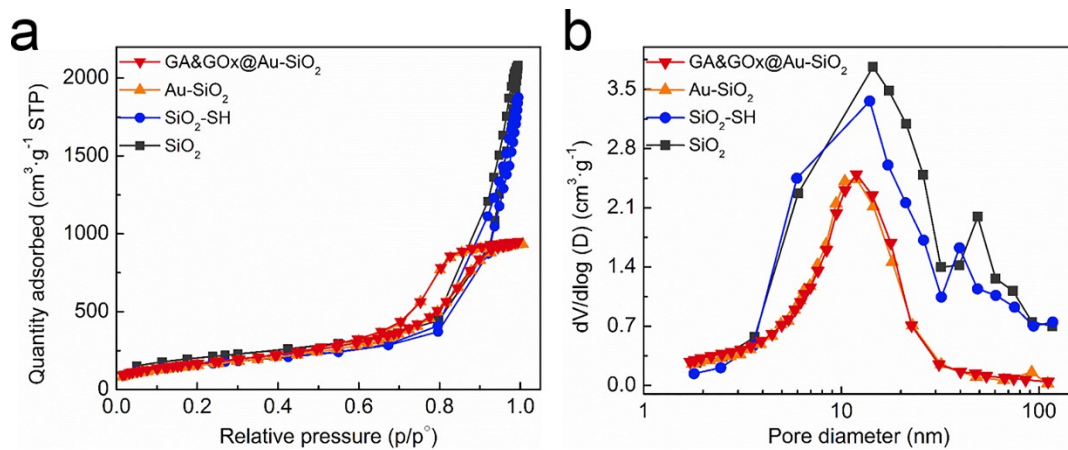

**Fig. S7.** (a) N<sub>2</sub> adsorption-desorption isotherms and (b) pore size distributions of SiO<sub>2</sub>, SiO<sub>2</sub>-SH, Au-SiO<sub>2</sub>, and GA&GOx@Au-SiO<sub>2</sub>.

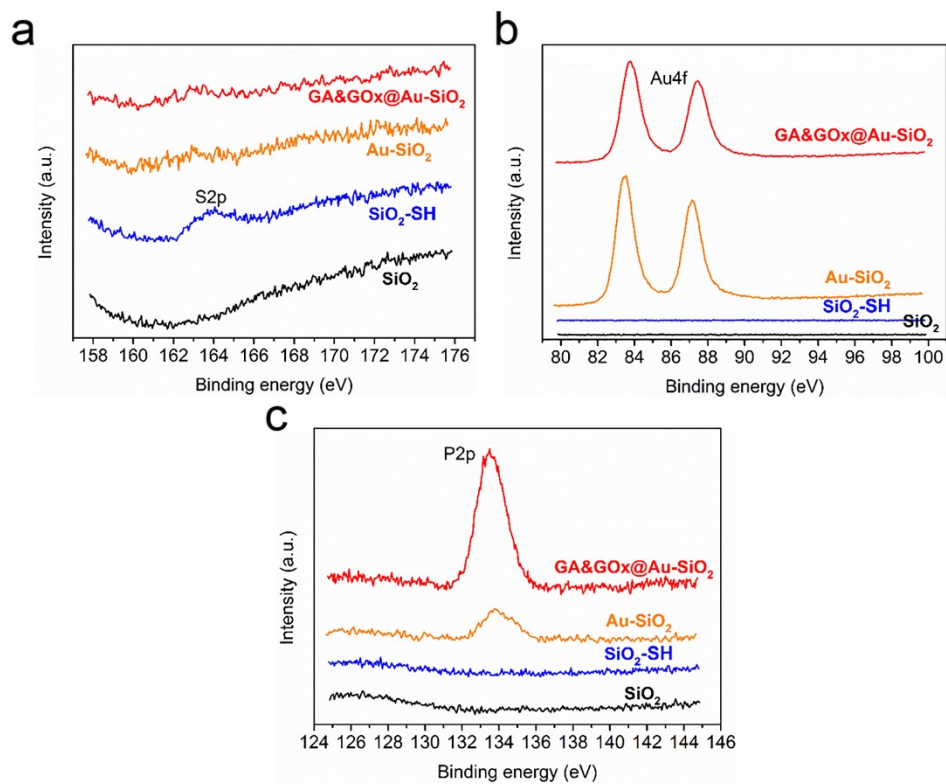

**Fig. S8.** XPS spectra of (a) S 2p, (b) Au 4f, and (c) P 2p of  $\text{SiO}_2$ ,  $\text{SiO}_2\text{-SH}$ ,  $\text{Au-SiO}_2$ , and  $\text{GA\&GOx@Au-SiO}_2$ .

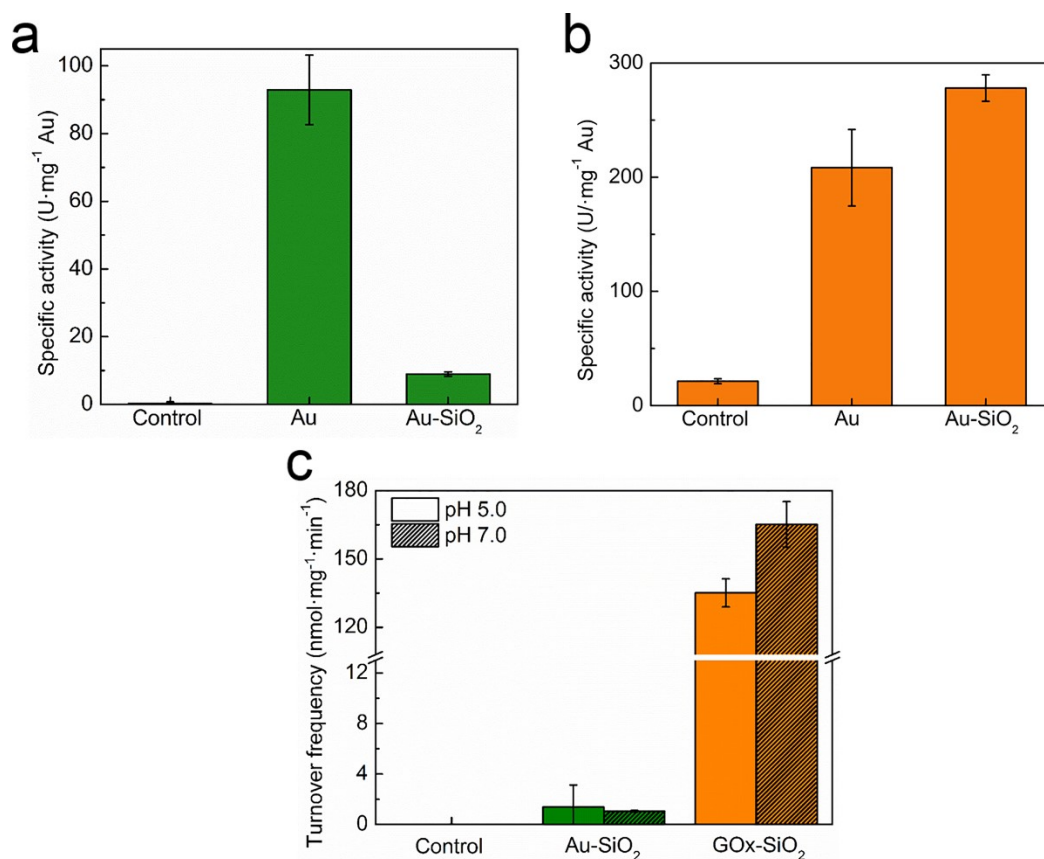

**Fig. S9.** Specific activities of Au and Au-SiO<sub>2</sub> for (a) glucose oxidation and (b) H<sub>2</sub>O<sub>2</sub> decomposition. Reaction condition: 1 mg·mL<sup>-1</sup> glucose or 10 mM H<sub>2</sub>O<sub>2</sub>, 100 mM PBS (pH 5.0, containing 10 mM NaCl), 40 °C. Error bars represent standard deviations from triplicate experiments. (c) Turnover frequencies of Au-SiO<sub>2</sub> and GOx-SiO<sub>2</sub> for glucose oxidation. Reaction condition: 1 mg·mL<sup>-1</sup> glucose, 100 mM PBS (pH 5.0 or 7.0, containing 10 mM NaCl), 40 °C. Error bars represent standard deviations from triplicate experiments.

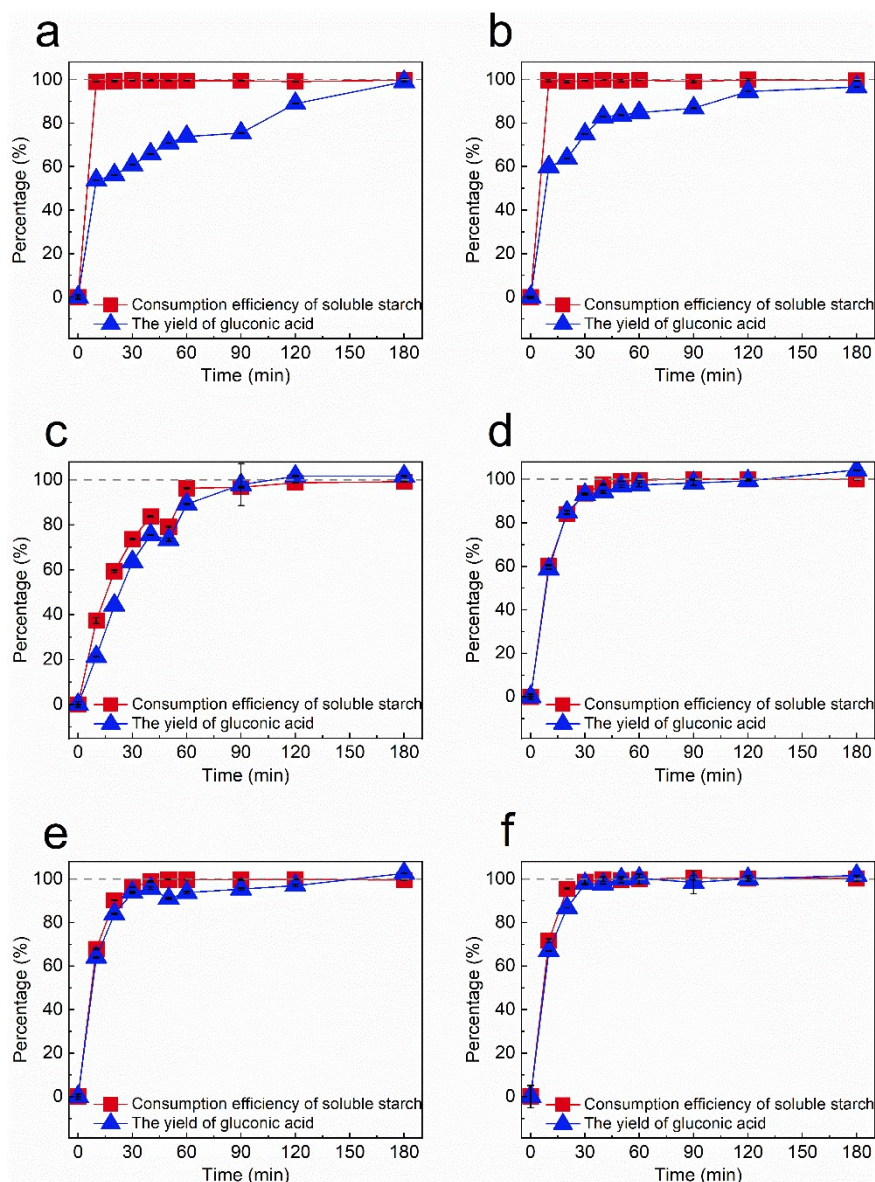

**Fig. S10.** Time course of the consumption efficiency of soluble starch and the yield of gluconic acid in the reactions catalyzed by (a) free enzymatic cascade system (GA and GOx), (b) free chemoenzymatic cascade system (GA, GOx, and Au-SiO<sub>2</sub>), (c) partly integrated system (GA&GOx@SiO<sub>2</sub> and Au-SiO<sub>2</sub>), and highly integrated system (GA&GOx@Au-SiO<sub>2</sub>) with the GA/GOx ratios of (d) 1/1.48, (e) 1.06/1, and (f) 1.44/1 with different loadings of GA and GOx. Reaction condition: 100 mM PBS (pH 5.0, containing 10 mM NaCl), 40 °C, 0.5 mg·mL<sup>-1</sup> soluble starch. Error bars represent standard deviations from triplicate experiments.

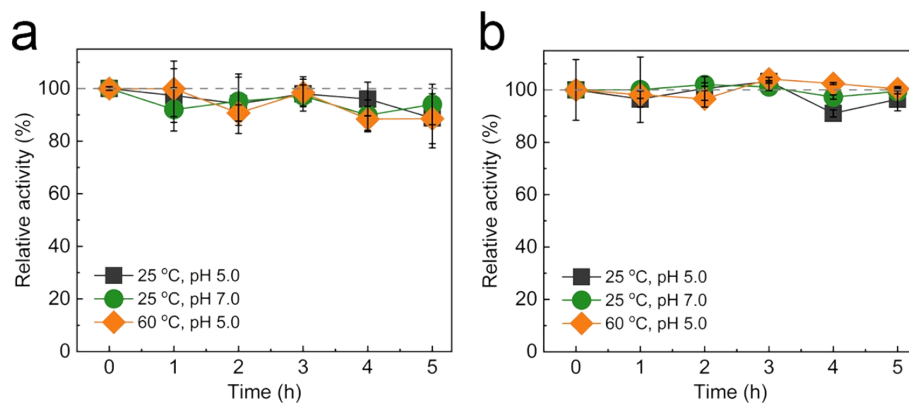

**Fig. S11.** The stability of Au-SiO<sub>2</sub> with (a) glucose and (b) H<sub>2</sub>O<sub>2</sub> as substrates at different conditions. Reaction condition: 100 mM PBS (pH 5.0, containing 10 mM NaCl), 40 °C, 1 mg·mL<sup>-1</sup> glucose or 10 mM H<sub>2</sub>O<sub>2</sub>, 0.2 mg·mL<sup>-1</sup> Au-SiO<sub>2</sub>. Error bars represent standard deviations from triplicate experiments.

**Table S1.**Pore structure characteristics of SiO<sub>2</sub>, SiO<sub>2</sub>-SH, Au-SiO<sub>2</sub> and GA&GOx@Au-SiO<sub>2</sub>.

| Samples                    | Specific surface area<br>(m <sup>2</sup> ·g <sup>-1</sup> ) | Pore volume<br>(cm <sup>3</sup> ·g <sup>-1</sup> ) | Average pore size<br>(nm) |
|----------------------------|-------------------------------------------------------------|----------------------------------------------------|---------------------------|
| SiO <sub>2</sub>           | 706.4                                                       | 3.18                                               | 8.29                      |
| SiO <sub>2</sub> -SH       | 567.3                                                       | 2.92                                               | 8.43                      |
| Au-SiO <sub>2</sub>        | 606.7                                                       | 0.14                                               | 7.22                      |
| GA&GOx@Au-SiO <sub>2</sub> | 560.8                                                       | 0.13                                               | 7.13                      |

**Table S2.**

The isoelectric points of SiO<sub>2</sub>, SiO<sub>2</sub>-SH, Au NPs, and Au-SiO<sub>2</sub>.

| Samples              | Isoelectric point |
|----------------------|-------------------|
| SiO <sub>2</sub>     | 4.48              |
| SiO <sub>2</sub> -SH | 3.90              |
| Au                   | 1.52              |
| Au-SiO <sub>2</sub>  | 3.69              |
